# Supplementary material for: Identification of cytokine-induced cell communications by pan-cancer meta-analysis
Source: PeerJ. 2023 Dec 1;11:e16221. doi: 10.7717/peerj.16221 (PMC10695116; doi:10.7717/peerj.16221)
Supplement: Table S1 [file peerj-11-16221-s001.xlsx]

## Sheet: Sheet1
Description	Count	Ratio	Log(q-value)
Cytokine Signaling in Immune system	49	6.85315	10E-53.1222663481
Pathways in cancer	32	6.02637	10E-30.4731803906
immune system development	19	2.78184	10E-11.1782204535
regulation of adaptive immune response	16	8.51064	10E-16.3440892233
positive regulation of adaptive immune response	14	12.1739	10E-16.2541899198
regulation of adaptive immune response based on somatic recombination of immune receptors built from immunoglobulin superfamily domains	15	8.67052	10E-15.3512526461
positive regulation of adaptive immune response based on somatic recombination of immune receptors built from immunoglobulin superfamily domains	13	11.8182	10E-14.823540626
regulation of lymphocyte mediated immunity	14	8	10E-13.7568807276
regulation of immune effector process	17	4.81586	10E-13.4858393516
regulation of leukocyte mediated immunity	15	6.35593	10E-13.4179561471
positive regulation of lymphocyte mediated immunity	12	10.2564	10E-12.8512995955
regulation of T cell mediated immunity	11	12.5	10E-12.5970525961
positive regulation of leukocyte mediated immunity	12	8.69565	10E-12.0300060435
positive regulation of T cell mediated immunity	9	15.2542	10E-10.8913410577
positive regulation of immune effector process	13	5.24194	10E-10.4397527983
regulation of production of molecular mediator of immune response	11	6.58683	10E-9.6823952817
positive regulation of production of molecular mediator of immune response	10	8.33333	10E-9.6685566786
regulation of T-helper 1 type immune response	7	24.1379	10E-9.6597852826
positive regulation of immune response	16	2.86225	10E-9.3611505608
positive regulation of T-helper 1 type immune response	6	33.3333	10E-9.0254356396
regulation of cytokine production involved in immune response	8	8.16327	10E-7.4473868597
positive regulation of cytokine production involved in immune response	6	8.82353	10E-5.5946257617
SARS-CoV-2 innate immunity evasion and cell-specific immune response	7	10.2941	10E-7.0727193511
Constitutive Signaling by Aberrant PI3K in Cancer	10	12.8205	10E-11.472655409
PI3K/AKT Signaling in Cancer	10	9.61538	10E-10.255018018
Senescence and autophagy in cancer	7	6.48148	10E-5.7940009748
Interactions between immune cells and microRNAs in tumor microenvironment	5	12.5	10E-5.2429898127
Gastric cancer	5	3.3557	10E-2.7201705572
positive regulation of type 2 immune response	3	17.6471	10E-3.2898566489
regulation of type 2 immune response	3	9.375	10E-2.5466708914
Intestinal immune network for IgA production	9	18.3673	10E-11.6040718008
adaptive immune response based on somatic recombination of immune receptors built from immunoglobulin superfamily domains	7	2.9661	10E-3.7246615632
cell activation involved in immune response	6	3.2967	10E-3.3362893408
lymphocyte activation involved in immune response	5	4.06504	10E-3.0588083541
T cell activation involved in immune response	4	5.55556	10E-2.7947358699
CD4-positive, alpha-beta T cell differentiation involved in immune response	3	9.09091	10E-2.5101367052
alpha-beta T cell activation involved in immune response	3	8.82353	10E-2.4765238425
alpha-beta T cell differentiation involved in immune response	3	8.82353	10E-2.4765238425
leukocyte activation involved in immune response	5	2.80899	10E-2.402361197
T cell differentiation involved in immune response	3	7.89474	10E-2.3494868245
immune effector process	7	1.63551	10E-2.2834583219
adaptive immune response	8	1.2966	10E-2.0893290315
